# Supplementary material
Source: HighWire-hosted journal article supplement (https://jitc.bmj.com/content/11/1/e005809)
Supplement: inline-supplementary-material-1 [file inline-supplementary-material-1.xlsx]

## Sheet: Sup table 1
Sup Table 1. Raw NanoString counts for immune and housekeeping genes in CUP and known metastatic tumour samples
*SUPER- CUP sample
**MET-known origin metastatic tumour sample
	PRF1	CD8B	CXCL9	CTLA4	GZMB	THBS2	CD79B	PECAM1	IDO1	FOXP3	CD244	CXCL10	GZMA	COL1A1	IL6	EOMES	PDCD1 (PD-1)	PDCD1LG2 (PD-L2)	CXCL8 (IL8)	CD19	CD160	IFNG	LAG3	CD274 (PD-L1)	FAP	CD68	PRDM1	CD80 (B7.1)	CD8A	HAVCR2	ESM1	CTGF	MS4A1 (CD20)	TBX21	PTGS2 (COX-2)	PRPF38A	ZNF143	TRIM39	EIF2B4	ERCC3
	Immune	Immune	Immune	Immune	Immune	Immune	Immune	Immune	Immune	Immune	Immune	Immune	Immune	Immune	Immune	Immune	Immune	Immune	Immune	Immune	Immune	Immune	Immune	Immune	Immune	Immune	Immune	Immune	Immune	Immune	Immune	Immune	Immune	Immune	Immune	Control/House keeping	Control/House keeping	Control/House keeping	Control/House keeping	Control/House keeping
MET-300	453	149	866	344	464	1243	146	1470	208	154	127	1485	4302	38167	650	39	96	217	2074	107	199	145	130	69	898	1657	320	467	404	408	189	17965	95	177	246	2071	398	567	2010	681
MET-301	1273	307	9212	1360	1815	3029	491	1957	400	134	59	4672	1562	19956	86	194	296	351	404	224	78	121	458	273	4809	2293	572	544	1048	782	140	1806	1097	168	55	3112	683	275	2131	700
MET-308	327	145	6479	245	222	500	320	1193	171	59	24	3000	476	4824	54	82	198	295	306	126	72	69	246	195	267	1147	162	237	664	331	123	1825	595	74	33	1052	284	225	1081	427
MET-309	117	28	307	1335	131	1129	27	947	60	30	19	313	128	18403	339	134	33	134	14769	24	19	19	53	68	2638	2644	201	166	104	407	83	1229	19	19	347	1439	458	274	1611	559
MET-310	121	35	284	77	94	1931	62	939	73	50	17	423	124	15480	376	69	28	95	5938	17	21	17	65	25	892	2244	136	188	97	292	400	4819	32	24	182	1731	432	297	1598	680
MET-315	68	45	547	43	50	320	37	897	145	17	20	677	79	1483	29	14	29	29	327	16	19	18	32	25	43	747	39	60	49	156	393	565	17	21	24	943	226	212	627	306
MET-318	143	105	104	119	141	416	96	2727	98	103	51	163	192	33466	36	24	124	52	191	45	99	110	112	12	168	236	272	218	187	166	1542	1243	46	82	112	2238	362	383	1516	548
MET-319	359	137	853	214	297	2158	267	1342	353	137	45	429	546	7813	140	62	79	89	2063	110	94	117	60	42	410	980	409	286	352	274	952	3326	315	75	251	959	251	191	735	284
MET-322	458	131	2015	207	459	4468	69	1276	495	49	258	1972	2181	15494	272	41	122	1146	1156	47	128	94	219	84	785	1136	243	402	494	512	1330	2049	66	145	181	3912	590	274	1723	486
MET-324	172	116	263	174	591	4653	81	1636	102	99	70	296	276	9749	398	39	66	122	7077	70	78	87	34	55	1141	1194	398	328	180	357	808	4454	122	67	330	1849	417	257	1260	336
MET-326	326	97	557	409	160	904	152	2039	293	122	55	521	678	1947	274	40	77	147	1252	57	35	35	218	140	607	1862	291	763	382	465	53	5522	278	89	365	1863	596	195	1211	469
MET-328	559	226	1883	377	579	4746	327	2182	412	127	74	2167	1242	19988	230	64	135	197	1174	141	99	135	139	96	676	1719	762	416	795	524	123	5788	377	120	290	1342	337	284	863	312
MET-329	274	115	1311	127	393	1754	129	1138	235	54	39	1023	418	6635	145	39	81	83	2527	81	56	56	57	62	223	1019	262	245	337	243	308	2144	93	54	111	1097	244	232	913	317
MET-330	404	140	2699	339	296	4063	464	1464	567	132	52	997	810	15670	130	59	142	208	692	170	80	114	149	133	754	1284	515	377	593	499	190	1723	623	105	263	1053	240	178	837	366
MET-331	335	232	296	380	373	4203	335	674	164	172	151	508	464	38227	303	64	123	91	1697	161	244	267	63	80	1049	687	416	585	362	314	347	2487	192	213	523	2246	394	439	1031	462
MET-332	248	46	220	93	131	1332	64	2273	1780	40	28	310	221	17515	4614	16	43	79	5020	27	41	74	50	48	819	1326	299	210	125	334	775	4819	40	43	211	1916	371	170	966	381
MET-333	483	138	3240	307	295	676	125	658	767	83	25	4457	537	8391	94	39	148	142	652	47	28	51	272	82	551	1310	224	210	543	538	132	1507	158	72	51	1831	373	215	964	516
MET-334	322	119	7716	234	312	5868	387	1960	1456	98	15	2175	644	85764	354	37	130	308	930	113	30	31	143	134	1942	1607	395	324	426	766	238	2174	509	79	36	1100	381	138	847	319
MET-336	175	93	1129	139	152	3680	125	845	158	62	79	487	347	71058	70	39	69	114	1191	55	90	104	43	43	1077	1654	126	222	275	241	529	3752	72	54	115	1123	262	165	1040	629
MET-337	691	245	4924	364	442	6075	76	762	929	93	26	3269	1407	87766	295	76	281	348	240	11	19	80	698	119	2322	835	364	278	1459	625	122	9464	51	168	45	1186	257	191	1225	562
MET-338	145	65	1183	139	160	3512	52	772	95	46	19	663	309	3806	42	17	56	129	279	24	21	15	142	41	230	2903	169	166	171	235	248	954	28	37	15	2437	575	109	2078	957
MET-342	169	74	493	160	242	2554	312	781	87	80	107	333	315	8919	224	51	82	74	495	117	156	125	36	26	383	1070	250	235	234	273	127	2152	282	113	179	734	133	313	431	192
MET-343	1631	441	5020	885	1032	23066	272	1374	483	138	105	3844	2063	8293	756	156	630	384	1468	118	114	231	1215	158	698	2658	525	774	2022	1264	651	2318	173	205	267	2230	424	407	1857	740
MET-346	858	201	4766	346	721	1052	549	1355	331	162	67	1718	1590	3098	92	96	178	420	424	342	79	96	408	229	340	2505	774	592	831	571	161	1524	953	129	76	2530	605	466	1840	595
MET-347	229	89	1085	121	113	340	83	458	181	47	22	793	315	734	88	25	74	88	943	35	41	42	130	44	219	1186	152	277	271	345	170	957	114	31	42	991	161	109	674	239
MET-351	126	109	112	138	105	128	132	1	45	93	75	168	164	945	90	27	57	5	122	48	109	166	7	3	119	180	82	246	183	116	104	185	58	68	131	487	2	182	214	73
MET-353	105	56	276	34	75	2047	47	372	44	26	28	255	157	50948	27	23	29	107	59	31	28	32	104	36	39	177	144	123	115	106	52	6206	35	20	42	1866	431	189	1156	472
MET-360	100	155	36	37	521	1208	46	320	16	43	21	51	60	17457	83	13	24	34	468	20	43	34	15	20	41	1068	121	52	73	79	416	5762	17	14	127	1648	343	238	1396	415
MET-364	23	20	22	22	11	388	27	354	16	11	5	12	65	1496	28	5	10	24	25	13	13	6	11	9	171	152	76	37	51	50	31	947	28	7	26	385	135	62	404	142
MET-368	706	153	7938	567	811	8464	468	2801	778	336	198	3662	1103	35487	608	99	255	418	1570	273	126	329	324	140	1879	3162	1303	883	506	1032	1896	9218	183	137	374	4259	991	859	5557	1068
MET-371	389	173	458	534	413	2614	270	1524	217	242	117	662	508	31569	616	55	142	148	8561	151	158	146	90	172	1072	887	648	507	459	385	325	5293	174	128	638	1255	325	442	2060	371
MET-372	142	376	1588	2126	453	725	24	293	350	25	17	265	131	13379	53	12	105	54	112	13	15	35	149	101	443	536	186	107	92	165	158	1265	18	15	31	782	194	91	874	271
MET-377	181	67	156	166	206	67	1620	1017	124	46	30	137	273	203	45	31	71	153	67	494	84	52	21	50	41	549	134	237	177	179	28	174	2610	44	108	487	118	98	262	113
MET-379	138	152	3717	100	154	2244	58	476	200	92	41	1045	262	38860	81	35	87	136	280	54	62	81	112	38	926	415	311	267	198	258	398	2418	63	42	108	1966	463	231	1239	550
MET-383	293	138	411	166	152	3674	197	1768	148	71	69	536	533	16481	76	45	93	125	450	71	78	125	61	31	435	1648	244	294	479	533	662	1519	177	68	129	1056	217	195	541	267
MET-395	914	68	241	103	337	5855	92	1357	135	89	43	638	332	135579	345	34	64	155	1478	56	71	60	88	40	1076	5633	575	292	237	702	782	5489	56	53	140	1247	321	213	896	311
MET-402	141	32	895	88	64	665	57	1487	208	48	16	1066	171	7672	22	15	28	76	254	9	18	11	49	46	290	671	127	126	100	100	139	1087	20	32	9	859	514	141	1328	231
MET-403	262	116	3503	157	192	19160	71	846	735	73	78	1995	836	11279	1142	24	83	650	1511	30	51	68	159	170	1355	1721	172	275	549	525	129	6392	41	43	207	953	281	169	825	355
MET-407	484	217	2514	284	647	2322	233	1113	665	129	85	2271	868	10104	252	35	166	140	656	95	81	133	190	67	370	991	481	405	550	295	589	2104	192	111	251	955	315	150	1201	423
MET-408	102	72	485	168	96	1732	69	1865	113	82	24	342	165	11876	284	18	57	86	470	31	27	60	39	75	700	387	933	242	143	192	96	6590	52	32	118	1380	305	176	1005	299
MET-409	313	133	2650	363	576	3208	875	1321	396	144	14	1183	626	11522	116	44	98	291	158	195	19	31	124	131	615	1688	348	421	339	553	67	1869	1436	54	368	757	282	112	554	223
MET-410	77	21	215	81	89	129	40	1030	211	35	13	317	157	3057	103	14	26	43	7338	17	24	13	70	60	87	1005	314	171	76	193	140	750	12	15	217	1259	346	114	877	204
MET-412	1260	292	7165	345	555	886	691	1050	367	118	81	961	1404	5585	105	105	456	190	110	201	256	179	398	67	315	824	347	392	948	319	220	1242	754	170	135	2117	343	325	1161	536
MET-413	288	353	595	790	312	538	975	3362	346	118	24	193	441	545	387	36	125	176	394	475	25	54	65	95	147	687	1553	282	633	338	102	14553	2478	75	277	1813	471	235	915	383
MET-421	435	266	1247	259	310	1728	138	2382	269	132	55	668	648	4198	662	43	116	140	2418	59	102	201	66	67	478	1282	297	287	305	299	987	4287	120	80	257	900	198	208	503	194
MET-422	68	49	38	201	54	38	311	287	52	26	7	41	120	405	30	22	50	29	258	179	9	15	40	17	21	102	220	83	109	51	15	1642	470	19	38	223	51	50	183	89
MET-425	325	106	1583	249	314	5047	163	2606	362	106	28	1843	569	14701	173	26	72	224	2202	56	48	57	100	110	925	1547	552	346	354	520	173	4161	122	71	149	1015	268	165	686	240
MET-426	685	278	8847	717	1262	6169	1337	4668	2350	233	17	6029	2008	72821	182	93	288	640	57	477	24	64	346	165	2558	2162	527	486	881	713	108	6960	3119	182	106	1727	544	213	1142	492
MET-428	582	219	727	793	706	720	2755	1473	408	395	123	384	774	1721	209	88	326	165	339	1037	179	191	79	94	303	4215	576	856	541	762	197	683	5710	239	337	1672	317	359	1005	355
MET-430	490	206	4198	226	177	5165	205	3104	248	58	29	1266	1634	73408	136	97	135	168	108	73	40	53	217	63	1047	1051	393	155	1123	273	117	5093	259	108	170	1097	336	244	1028	288
MET-433	73	39	245	94	62	729	130	198	33	58	46	111	134	6619	50	12	35	33	253	58	55	59	36	5	181	171	347	160	119	90	314	599	37	45	57	1066	181	220	817	319
MET-437	168	61	106	85	122	3146	40	1097	59	32	23	148	207	35663	75	21	22	72	431	14	14	7	47	27	872	1647	116	113	122	400	422	11232	26	26	64	718	319	120	1048	366
MET-438	403	109	3309	246	332	19704	200	541	492	58	70	2417	373	2986	150	23	113	58	225	83	80	141	240	64	240	318	362	128	484	186	69	1206	105	51	479	763	219	166	375	396
MET-440	290	216	954	139	142	341	236	819	188	67	29	265	448	3089	34	37	76	58	103	79	48	62	162	51	95	798	315	185	413	162	39	520	168	63	79	645	131	115	519	162
MET-441	508	84	2642	296	552	1987	145	776	292	170	20	854	1102	29460	73	21	66	451	1125	37	27	46	178	123	731	658	425	328	349	327	75	1687	87	47	330	1041	158	168	699	268
MET-442	287	91	455	76	136	4896	87	1975	241	43	19	194	342	103639	107	21	42	142	156	21	15	4	63	43	1055	1153	169	184	244	275	91	632	57	48	34	565	206	107	486	243
MET-443	63	37	127	62	447	6257	33	504	35	30	22	113	75	26747	366	16	30	60	7913	6	15	22	12	29	596	737	214	173	68	181	387	4214	26	9	92	774	264	177	694	342
MET-444	124	67	1572	164	220	481	52	181	5256	34	13	976	143	5006	149	14	72	58	1187	14	21	43	105	84	167	471	221	195	212	210	59	566	22	21	84	884	321	123	478	282
MET-445	157	59	55	100	140	1522	212	274	38	37	37	69	385	16343	182	22	55	29	9958	82	42	60	37	21	435	342	253	183	124	153	216	4182	185	37	175	484	101	120	401	228
MET-447	333	122	1796	578	382	2441	405	942	1351	110	44	1078	541	5209	129	56	152	119	423	223	56	74	209	98	309	879	421	343	529	369	323	1537	620	72	140	1419	233	347	1164	547
MET-448	241	89	653	155	218	1673	90	2636	219	64	38	536	384	9996	568	31	70	121	3840	62	39	59	85	186	470	1250	389	385	314	496	1395	4585	78	42	255	1067	281	177	1287	357
MET-449	132	57	553	135	174	1786	144	353	410	51	26	274	323	9751	632	19	47	41	2604	87	34	56	47	47	216	500	285	189	168	144	114	2740	152	44	232	467	122	112	396	189
MET-450	224	213	261	715	349	1103	360	215	157	169	264	347	358	8141	277	88	143	23	539	247	253	287	14	21	503	3024	308	518	410	275	313	1435	182	200	392	2425	261	567	2455	993
MET-451	352	125	1756	277	287	1780	741	1021	204	132	34	399	592	8841	52	55	116	120	1732	371	39	62	235	508	539	878	384	290	557	279	128	2829	1634	84	75	1462	384	190	748	483
MET-452	26	75	16	28	39	90	18	107	17	21	17	28	26	1270	32	10	20	11	4263	17	17	20	22	23	37	232	124	48	37	37	224	438	14	6	106	2056	314	175	1105	431
MET-453	298	165	405	559	190	8130	280	869	140	289	77	404	655	58168	190	62	157	122	5008	111	84	126	84	67	2447	1498	415	558	457	423	256	8580	309	89	239	1245	371	238	1165	372
MET-455	1038	494	7120	1075	1285	4009	892	1382	1524	372	205	2995	1551	13806	275	172	504	268	1026	655	377	317	610	121	921	1805	1932	1030	1427	762	274	5134	1259	345	428	3219	579	761	2481	1028
MET-456	127	101	543	94	119	1801	129	574	121	66	47	310	210	11679	75	39	62	61	2972	60	76	81	57	34	363	1293	146	217	199	321	175	1164	67	55	117	582	163	110	428	222
MET-458	120	91	188	131	85	484	137	197	70	55	85	202	104	11715	129	34	72	32	348	68	109	78	62	13	327	392	398	188	160	158	817	1765	51	80	187	2121	349	238	1816	508
MET-459	89	86	79	86	93	1113	105	342	52	84	48	115	128	6351	114	29	64	33	119	78	93	65	86	15	87	283	226	163	129	125	97	1729	32	47	123	1123	269	251	1014	404
MET-460	219	95	413	285	177	3005	157	1406	108	128	52	393	250	17931	1352	29	64	96	8348	47	58	79	41	57	898	855	975	326	242	284	628	3085	83	59	494	932	275	283	1038	300
MET-484	82	63	59	73	56	17631	67	972	38	29	44	73	100	178566	54	33	41	74	978	34	49	49	13	17	3208	1045	317	174	121	202	146	9946	59	23	83	965	343	204	886	441
MET-486	92	41	146	42	42	6504	48	967	41	31	5	37	117	78128	50	16	28	49	2086	9	8	6	21	16	2480	700	126	147	80	222	175	2119	16	16	104	371	125	59	333	175
MET-489	466	107	2551	338	453	2142	413	2310	521	164	36	894	1161	9071	180	51	106	140	1588	172	42	68	148	75	904	1050	870	268	545	349	147	5837	495	70	152	937	242	177	745	358
MET-494	19	14	17	12	10	57	29	140	5	11	7	11	29	60	43	9	13	13	33	67	42	14	24	32	36	48	18	22	27	18	10	451	5	2	67	176	43	64	230	48
MET-495	298	148	761	361	174	3581	175	1125	681	160	47	847	463	9929	106	49	122	77	2028	67	58	90	93	66	776	1158	385	412	449	297	143	4157	126	72	136	848	255	185	782	392
MET-497	53	29	47	23	38	101	47	277	39	15	10	32	123	853	5	14	14	18	43	22	10	15	58	17	8	451	170	46	100	32	6	703	37	13	27	394	95	81	334	111
MET-500	276	68	2523	190	344	3588	232	1033	313	87	20	817	379	18627	235	27	91	122	998	145	21	85	172	66	527	2328	301	332	224	548	362	4765	359	47	76	1095	306	139	885	295
MET-501	109	57	251	26	19	1362	69	430	19	59	20	124	173	8089	17	21	19	58	376	9	20	10	62	16	85	1598	56	113	124	198	54	1542	22	17	31	395	97	75	393	192
MET-502	350	139	1566	450	731	3401	216	688	320	123	41	239	520	21227	183	47	105	91	12114	95	78	100	160	57	633	657	607	276	383	373	188	4077	141	79	419	926	318	174	935	318
MET-504	157	64	654	242	113	6913	131	1323	329	131	17	147	316	51447	80	37	62	85	755	43	9	12	58	26	1767	1495	245	213	250	409	317	6630	184	42	238	765	248	121	637	286
MET-507	505	140	1650	545	266	921	500	1155	486	150	37	887	1191	5964	130	78	142	130	418	220	46	75	141	60	415	783	674	347	761	320	59	4093	896	74	123	887	236	178	601	260
MET-510	90	30	174	188	114	955	154	860	115	56	10	208	206	17232	119	10	25	58	1128	80	18	22	55	29	420	330	256	136	103	90	32	2641	337	18	80	297	114	65	337	140
MET-511	269	153	164	205	294	8504	294	2963	121	60	20	222	482	52237	1582	36	49	136	924	87	18	29	70	30	1178	876	356	141	501	346	280	20593	483	50	623	915	297	123	684	330
MET-513	142	33	378	122	192	1560	74	1718	173	67	9	784	188	8964	855	13	27	88	12971	28	14	17	65	58	681	475	407	248	77	148	179	2645	66	19	574	1131	348	188	1151	285
MET-514	68	33	50	36	32	1247	50	219	11	18	14	40	66	21745	22	13	26	20	753	18	21	21	16	15	289	318	50	89	87	123	72	1444	14	22	128	234	82	58	216	175
MET-517	234	73	254	236	164	486	244	1709	178	87	45	320	259	2700	56	27	75	87	3719	128	21	32	104	58	274	1049	779	251	169	211	517	1721	309	32	156	1542	494	261	928	520
MET-522	245	107	300	218	183	6140	216	2955	110	106	94	281	1697	4587	176	47	140	141	563	121	162	156	23	15	432	337	391	353	251	179	1984	3036	114	144	169	2027	338	309	1051	428
MET-526	866	153	7203	429	771	7572	129	832	463	106	128	2439	2065	21679	993	72	108	443	721	60	68	92	241	130	584	1754	413	324	706	564	127	7351	77	84	374	988	317	235	858	423
MET-527	125	81	290	116	193	3827	113	781	111	70	43	216	209	18221	180	28	54	47	7322	72	56	71	31	37	587	784	270	209	168	217	227	3697	41	57	181	925	236	144	737	249
MET-530	458	133	689	424	486	216	1672	2002	226	182	61	319	735	782	162	59	136	188	422	754	215	106	54	99	143	6997	478	591	331	941	86	523	4384	104	176	1049	324	209	616	247
MET-568	177	55	249	115	104	2875	107	762	69	65	23	246	302	16140	238	27	53	115	6255	33	25	40	45	49	1156	1378	250	255	137	293	209	2125	76	29	258	560	242	123	606	328
MET-581	366	205	2053	796	567	202	1811	803	446	217	63	423	666	1379	113	67	252	134	79	745	76	99	104	76	100	746	377	424	562	419	128	517	3939	126	95	1068	230	194	783	341
MET-589	205	148	740	318	209	926	1830	955	127	146	29	154	387	4357	79	51	170	99	46	804	27	51	68	47	148	616	180	309	330	204	64	1349	4278	80	59	1003	357	197	1028	349
MET-591	305	147	1605	528	343	1820	978	1054	283	189	75	728	469	6993	75	54	214	164	212	460	123	108	88	46	593	1282	578	422	431	438	199	2360	2233	120	132	1205	328	331	1231	416
MET-594	138	69	333	131	167	3686	374	871	51	67	30	144	228	14957	111	24	59	60	1278	123	43	51	51	17	567	897	400	183	252	236	145	1488	425	36	124	340	94	100	329	157
MET-595	334	320	853	697	421	346	3354	874	370	200	33	225	370	2432	82	44	199	110	79	1334	42	24	92	62	75	752	238	350	852	313	91	1160	7170	101	315	1302	338	200	1214	373
MET-596	80	65	203	259	135	156	1394	869	80	78	23	50	191	1621	67	30	66	38	96	349	28	35	34	24	64	792	263	192	152	175	50	455	1654	38	55	280	96	77	213	127
MET-598	257	97	1021	292	87	561	10327	843	135	119	48	187	499	3732	41	70	141	119	55	2576	103	109	94	68	143	707	137	307	270	222	59	457	8688	226	60	1026	349	210	576	311
MET-600	26	35	69	35	25	262	82	167	16	31	27	22	30	6022	14	8	17	6	23	18	22	20	42	14	83	118	44	77	46	60	94	526	9	13	20	1045	148	88	528	444
MET-603	392	147	786	524	305	1721	622	2043	281	196	39	316	549	15786	411	49	139	157	2510	344	35	34	123	111	724	2982	895	469	509	583	70	1838	1627	101	101	835	267	147	731	300
MET-604	98	74	1178	119	179	262	931	459	169	99	11	95	170	2337	16	22	72	46	19	507	17	20	28	21	84	233	102	171	246	142	36	355	2583	45	34	646	204	104	668	195
MET-606	47	14	85	16	20	178	18	500	20	7	5	53	37	1016	23	2	15	13	216	4	10	5	10	19	39	326	22	28	12	57	195	534	15	9	26	252	63	58	165	85
MET-607	354	107	8900	535	449	1434	657	1386	679	197	37	1501	537	8331	39	34	174	128	278	428	71	74	153	82	490	747	552	339	325	368	284	1019	1743	89	75	1161	280	174	833	311
MET-608	273	204	554	470	295	1159	1911	946	277	207	30	145	381	8104	117	36	122	86	47	782	69	37	118	45	419	957	183	395	473	378	52	2755	5822	65	87	1121	372	276	1009	585
MET-611	375	116	1142	231	282	2260	197	1411	312	100	55	427	366	4865	97	42	60	102	806	106	50	91	71	74	364	1322	326	313	282	322	479	2339	302	101	174	935	227	212	974	424
MET-612	190	96	461	187	270	714	1128	795	127	88	13	118	265	5144	42	34	52	88	37	492	42	22	37	32	244	426	153	220	274	183	44	1011	2623	75	56	650	205	120	603	223
MET-614	44	40	81	40	121	80	42	42	28	16	25	31	24	471	30	9	39	3	431	19	43	24	1	2	49	129	27	63	57	24	24	271	19	20	54	138	9	63	69	28
MET-615	157	83	166	155	123	189	109	916	140	63	48	100	144	1047	711	17	70	26	3117	64	48	71	42	18	63	760	247	253	206	203	898	1876	46	31	436	635	137	113	483	201
MET-617	94	57	348	151	69	1384	84	1889	70	35	32	165	133	2125	335	19	40	114	423	21	34	56	24	90	323	256	2395	206	126	170	80	18771	71	33	182	1700	303	174	768	298
MET-618	99	69	71	84	56	181	64	490	110	55	21	74	72	338	46	22	53	25	59	35	45	72	20	33	68	125	244	184	143	88	165	9158	49	48	89	1872	197	263	824	233
MET-619	194	113	533	155	104	1121	125	1531	114	34	35	256	419	4988	49	28	74	75	744	22	20	49	57	45	300	533	1521	252	292	215	86	7499	536	45	261	1306	330	162	799	271
MET-621	143	84	124	122	90	164	124	742	61	51	51	133	125	386	80	24	79	26	140	73	80	129	14	33	107	149	198	218	179	124	705	1289	63	64	117	692	115	190	602	157
MET-622	309	345	537	1109	331	366	1784	1615	486	93	37	308	359	430	1571	46	131	165	1134	478	57	80	64	89	86	570	403	392	536	346	78	2107	2817	78	392	1154	325	151	498	211
MET-623	58	17	28	8	22	37	28	343	6	11	7	12	34	525	8	5	20	12	116	5	11	5	13	26	21	278	525	28	58	62	111	342	16	9	35	612	118	112	406	225
MET-625	326	110	303	255	176	7610	233	1582	231	95	14	279	525	68730	1010	26	66	128	3062	194	12	12	68	46	1360	1335	754	309	339	403	532	12541	537	47	496	556	180	91	543	160
MET-634	700	162	1053	437	361	1429	341	1688	1417	134	21	485	1007	4027	130	47	171	159	1178	185	26	24	224	60	322	1222	866	263	746	479	364	10172	871	52	159	1672	360	213	976	424
MET-636	249	100	1587	144	90	4736	160	850	303	120	60	576	553	45732	67	40	61	78	725	59	33	69	72	35	1016	856	220	216	290	213	246	5480	169	46	100	644	201	109	534	222
MET-637	215	118	403	151	226	2751	182	537	109	81	73	250	373	194758	92	47	99	64	729	111	63	72	75	17	825	459	333	196	219	182	95	5542	188	102	211	1440	247	182	951	459
MET-638	23	19	18	23	22	1658	11	106	13	13	67	20	35	364	6	8	11	22	43	9	18	25	10	6	18	499	62	59	40	35	310	44	6	10	235	1049	328	114	933	327
MET-640	133	103	150	122	136	260	127	626	91	99	79	165	186	4050	79	29	58	58	218	73	115	117	15	28	90	405	274	246	245	150	1260	825	61	76	301	1268	292	254	1242	281
MET-641	756	204	4691	507	540	746	285	628	507	135	51	1855	822	3789	290	73	151	150	104	139	85	114	493	102	194	715	2582	320	596	264	78	863	437	158	70	1762	647	390	1547	545
MET-642	298	108	185	276	223	17157	204	3317	911	144	61	250	459	98064	630	42	90	259	37155	105	58	77	40	91	4257	2174	1131	503	237	665	280	12468	130	78	463	1360	421	194	989	366
MET-645	86	56	320	87	119	2307	43	404	194	34	31	214	106	1129	24	10	38	49	5199	8	13	17	47	35	30	685	154	115	125	129	321	268	17	18	97	1796	453	194	1363	515
MET-646	964	321	1687	745	723	6442	552	2158	5134	196	40	1052	1643	40131	392	95	267	296	1114	299	44	59	288	60	1280	1770	1089	342	1230	706	123	14051	1207	82	151	1109	283	203	840	392
MET-701	28	24	20	27	35	108	49	127	18	11	1	8	63	2457	9	10	9	10	95	23	5	2	8	9	9	149	41	22	31	16	17	89	80	1	47	226	35	31	139	68
MET-702	72	29	75	63	42	969	23	955	21	5	4	40	129	966	72	12	31	76	596	8	10	11	23	285	72	630	267	49	70	271	1507	7188	39	23	268	848	193	163	903	291
MET-703	197	25	139	149	113	3178	135	2468	89	5	3	88	251	1591	2967	24	31	115	2250	48	15	4	28	59	140	723	392	59	58	204	461	24801	403	37	445	641	214	100	525	204
MET-704	262	93	846	73	102	734	74	1365	304	79	19	590	697	3175	67	47	53	93	1394	32	31	21	158	48	108	852	378	191	413	276	312	1540	87	44	114	1186	361	196	1129	335
MET-704-QD	262	93	846	73	102	734	74	1365	304	79	19	590	697	3175	67	47	53	93	1394	32	31	21	158	48	108	852	378	191	413	276	312	1540	87	44	114	1186	361	196	1129	335
MET-705	81	14	28	24	32	1874	26	1100	111	10	2	98	96	9486	167	8	13	151	95	4	18	13	615	17	2101	257	1411	107	84	111	550	6759	34	18	35	2735	615	309	935	832
MET-706	37	25	310	44	23	203	96	234	59	13	1	66	73	3504	114	11	14	18	98	29	3	5	14	31	76	286	177	44	97	44	24	3115	89	6	49	150	29	32	140	60
MET-707	84	20	190	24	35	328	25	206	22	10	4	38	94	33398	52	92	16	4	126	6	5	2	34	11	73	364	88	36	69	36	476	1213	7	10	13	381	61	67	293	179
MET-708-2	26	24	39	121	27	37	166	36	15	11	2	4	39	5925	48	13	26	4	36	164	4	1	12	14	25	333	154	83	57	33	4	786	704	6	69	65	13	18	55	36
MET-709	413	96	3299	188	375	831	148	443	660	99	10	2316	540	6996	32	36	107	136	2029	72	21	31	236	110	148	1058	358	200	522	273	330	997	264	57	1018	1236	365	233	1026	519
MET-710	946	50	431	158	1170	299	97	428	266	54	11	1067	794	17675	98	65	64	101	190	32	13	12	519	144	104	1735	271	210	382	233	239	1296	76	83	36	1072	213	215	1180	448
MET-711	36	22	24	33	13	21	16	31	19	3	3	16	90	1812	23	8	16	4	49	8	12	8	6	5	22	389	38	45	50	19	150	452	16	11	52	86	8	14	67	27
MET-712	149	38	914	14	17	62	18	264	154	1	1	60	205	855	15	15	18	11	12	3	7	3	35	17	5	247	51	15	237	78	966	580	18	9	9	51	23	16	50	35
MET-713	86	39	465	20	29	411	138	633	70	16	9	91	152	2215	35	12	19	29	46	22	10	10	44	39	35	274	96	31	118	303	954	1464	76	13	45	191	113	61	193	108
MET-714	140	33	1303	61	96	96	31	51	269	7	7	35	160	3228	18	21	30	13	40	21	5	4	68	38	17	253	78	38	291	68	16	295	36	12	18	57	17	10	47	35
MET-715	116	41	23	48	21	113	155	224	48	10	10	11	73	1525	32	1	22	18	191	100	10	8	42	18	18	360	161	30	175	51	12	1777	282	10	63	217	82	47	262	144
MET-716	5	7	7	3	3	4	4	1	1	1	1	2	3	2049	12	2	12	2	44	6	1	1	2	1	1	67	10	13	9	5	6	34	2	1	10	5	6	2	11	9
MET-717	3	8	2	1	2	1	4	1	4	4	1	4	5	21	3	7	5	1	11	4	3	1	2	11	7	2	1	9	3	2	2	5	1	1	4	4	10	2	7	2
MET-718	129	55	197	59	34	777	80	408	43	19	11	19	173	6458	620	21	31	20	2635	62	9	8	47	14	154	355	181	53	273	116	62	2188	116	15	152	290	141	62	271	209
MET-719	146	70	436	90	55	106	75	164	73	24	9	51	236	2085	19	10	37	19	32	39	13	3	64	24	37	298	158	66	188	83	7	1930	107	17	26	277	61	36	163	107
MET-720	21	9	47	7	10	79	77	39	17	6	9	5	23	2351	18	3	9	2	87	21	1	1	15	8	6	55	34	10	26	16	6	532	16	1	9	35	25	15	43	57
MET-721	148	45	264	126	57	1593	113	543	66	30	3	101	285	13949	79	38	52	44	1054	128	3	4	43	18	382	1001	260	82	308	172	60	5597	498	39	102	450	130	90	397	200
MET-722	1	1	2	2	1	30	2	83	3	1	1	1	1	358	5	1	3	1	62	1	1	1	1	4	3	21	20	1	5	1	342	121	1	1	6	46	6	6	31	29
MET-723	62	22	218	43	21	2940	20	283	37	14	4	24	55	26731	621	9	18	21	732	6	2	1	12	41	405	307	121	74	90	119	127	1037	16	4	96	203	76	62	195	209
MET-724	18	9	14	22	21	148	26	314	1	11	1	3	6	881	6	2	7	11	187	3	2	3	23	87	29	180	60	20	32	39	319	293	3	4	12	420	171	264	562	574
MET-725	289	147	660	146	173	136	873	148	96	108	62	175	223	716	71	37	124	26	104	261	82	91	46	25	77	239	105	242	204	108	88	208	954	88	69	686	145	148	417	203
MET-726	114	18	1498	49	97	728	50	260	88	20	7	318	103	9640	13	5	33	64	28	16	7	6	87	28	155	348	87	99	133	119	356	582	42	27	8	1626	375	207	1477	683
MET-727	1081	187	6979	429	1020	1041	482	1569	655	165	22	1469	893	13710	37	71	122	180	68	239	28	19	639	145	425	1675	367	627	726	492	536	1083	1139	176	44	2049	593	233	1839	644
MET-728	7	11	11	9	8	4	3	2	3	2	3	3	1	175	1	3	11	1	15	8	7	1	2	6	3	19	4	4	6	2	2	7	1	1	4	13	9	5	12	14
MET-729	29	53	21	23	8	11	18	4	19	11	3	7	22	20835	12	9	20	1	27	14	23	5	5	8	16	185	30	45	30	17	4	251	8	2	36	29	9	9	13	19
MET-730	185	22	1277	132	75	1027	163	401	298	55	1	172	158	17819	65	11	23	41	405	66	3	2	51	14	155	643	444	48	140	137	46	2966	200	18	38	296	102	30	270	134
MET-731	48	23	350	115	45	1999	42	189	22	37	3	38	306	31677	530	17	29	24	768	17	5	4	37	40	253	451	347	69	50	83	454	2719	13	13	77	558	116	30	532	274
MET-732	630	155	1927	618	1525	293	3128	1149	673	115	5	243	645	1997	300	46	189	94	794	1344	24	8	135	69	39	1095	1054	287	420	292	31	736	5334	79	307	603	215	128	495	354
MET-733	234	24	1725	121	206	3713	22	714	329	32	21	1140	173	41924	207	14	41	136	5616	2	6	6	103	37	1285	1569	651	277	149	259	573	2425	12	14	197	1294	459	276	1061	360
MET-734	254	279	523	314	82	91	111	189	288	244	5	363	331	2933	41	43	54	28	2523	67	7	16	159	85	30	287	344	242	369	134	187	333	211	22	399	483	148	58	414	270
MET-735	262	77	571	273	229	485	160	706	473	175	3	401	531	16945	30	21	50	68	794	71	6	8	133	155	152	336	1017	189	174	131	505	820	99	24	393	1008	289	108	640	437
MET-736	327	96	5260	334	320	113	295	212	1345	90	6	2646	372	4595	122	26	93	379	2569	129	7	32	204	999	28	1064	443	293	452	176	93	373	360	31	163	357	89	66	275	200
MET-737	35	6	200	29	32	1854	23	122	42	20	1	47	44	81437	32	20	10	12	838	9	3	4	42	10	252	270	332	65	22	53	197	1882	2	3	143	734	108	72	405	419
MET-738	397	173	440	226	320	1304	1220	461	249	97	5	87	360	23560	781	27	59	46	2430	395	27	8	84	53	144	840	555	245	653	180	48	3759	1506	42	255	308	76	77	249	190
MET-739	108	51	75	65	45	6703	38	306	21	48	4	131	73	89287	176	12	17	70	387	9	4	3	42	21	552	639	118	131	117	217	51	2445	18	16	174	258	97	53	171	154
MET-740	139	46	323	184	63	993	96	483	160	28	12	114	217	1820	127	21	48	86	256	41	12	7	83	40	101	149	272	102	241	118	18	3190	169	29	644	1137	361	174	1187	267
MET-741	37	97	46	61	16	535	34	381	55	14	22	101	48	1193	29	5	23	44	792	25	4	4	21	24	293	172	156	80	62	110	24	9746	49	10	655	1630	430	178	2412	366
MET-742	72	23	211	38	70	178	9	224	85	17	16	232	43	732	385	5	24	67	988	10	6	6	66	32	65	96	180	65	120	85	40	7724	20	15	340	1301	375	181	1817	308
MET-743	35	25	170	54	18	416	11	166	102	8	1	109	93	2580	23	14	13	24	68	1	6	1	27	16	190	82	69	42	90	50	19	10650	11	12	492	332	129	54	457	215
MET-744	98	36	120	80	38	401	11	281	67	15	17	132	52	796	516	12	23	74	1449	6	6	8	23	26	168	160	169	64	141	133	14	11187	34	12	342	1025	286	134	1608	242
MET-745	24	58	31	33	18	423	13	173	19	8	10	18	22	636	61	4	12	54	83	4	3	5	27	9	102	73	84	87	110	86	26	2311	16	11	115	971	223	130	1528	340
MET-746	13	10	11	8	10	27	7	6	89	3	3	11	21	5861	7	4	4	5	55	2	6	1	4	6	10	73	9	11	9	9	17	152	1	1	8	21	7	4	26	20
MET-747	25	24	51	12	7	201	14	10	17	7	2	18	19	7386	7	12	8	3	33	6	8	5	13	5	50	63	9	19	24	18	38	209	6	5	22	87	13	12	45	42
MET-748	65	108	81	70	72	80	36	3	101	55	26	70	94	919	62	15	36	2	87	50	110	58	2	5	74	41	68	193	77	47	125	141	27	29	175	232	6	93	104	51
MET-749	71	16	413	18	27	1097	49	109	146	15	4	94	70	30381	11	12	15	21	31	9	4	2	29	18	255	305	78	51	36	66	85	546	27	9	7	162	47	27	222	83
MET-749-2	23	12	157	11	15	514	15	54	65	9	1	56	34	14160	9	5	7	6	24	5	3	3	13	9	114	113	30	21	17	36	47	232	9	5	1	84	22	22	83	47
MET-750	9	8	8	4	3	127	7	50	2189	10	5	5	2	2435	16	1	4	5	69	1	2	1	63	10	25	29	42	10	9	16	129	174	4	1	7	406	101	50	375	267
MET-751	143	235	240	235	130	205	102	13	99	156	37	252	185	3126	184	42	61	7	382	144	193	144	12	9	425	129	178	334	215	202	159	4248	99	48	309	952	64	270	415	202
MET-752	41	16	120	17	21	734	23	46	75	12	6	21	69	17353	33	11	13	9	167	7	8	6	32	8	55	166	47	27	68	32	38	1343	11	2	14	68	22	36	65	46
MET-753	43	40	76	32	23	1711	11	95	77	29	4	34	66	24144	57	10	26	13	188	14	30	15	14	5	234	161	51	43	78	61	79	1877	17	12	38	216	29	27	125	80
MET-754	36	11	6	13	39	2992	6	922	14	5	9	68	34	42503	327	6	12	99	1588	1	5	3	31	28	1072	3003	215	212	33	701	1708	19516	17	8	148	1341	330	92	1083	268
MET-754-QD	36	11	6	13	39	2992	6	922	14	5	9	68	34	42503	327	6	12	99	1588	1	5	3	31	28	1072	3003	215	212	33	701	1708	19516	17	8	148	1341	330	92	1083	268
MET-755	266	73	482	439	570	17901	485	3137	131	73	13	247	652	29445	397	31	114	713	334	148	51	15	60	95	5501	1690	1271	170	231	636	135	13700	371	64	211	812	395	134	810	258
MET-755-QD	266	73	482	439	570	17901	485	3137	131	73	13	247	652	29445	397	31	114	713	334	148	51	15	60	95	5501	1690	1271	170	231	636	135	13700	371	64	211	812	395	134	810	258
MET-756	60	92	187	42	31	36	17	41	239	25	9	88	112	4366	26	35	46	21	110	22	21	12	54	32	59	390	40	71	287	65	25	314	7	8	25	99	39	17	93	47
MET-757	30	42	25	19	12	195	22	19	34	21	8	30	52	11250	26	12	24	4	43	31	33	8	7	22	56	57	34	39	23	28	18	1113	11	13	47	76	16	29	71	33
MET-760	104	48	833	85	95	2354	39	786	63	45	19	775	256	12633	66	21	36	76	936	5	12	23	103	64	444	1135	155	211	132	421	84	1102	16	18	27	696	203	64	562	258
MET-761	107	139	75	85	74	54	56	1	69	78	22	87	91	397	58	18	73	3	96	44	71	59	1	8	68	44	71	135	74	45	94	76	24	57	106	204	22	81	112	39
MET-763	172	94	749	149	58	1336	34	379	85	33	7	192	418	78526	115	68	70	56	27	13	9	11	104	34	788	664	277	104	606	156	24	7562	99	23	47	291	52	45	282	109
MET-764	72	48	1231	64	50	172	160	78	47	34	18	261	116	2915	51	36	38	13	162	77	48	21	24	38	67	405	51	57	158	53	29	316	273	16	34	152	39	41	152	43
MET-765	28	18	99	12	13	535	15	50	22	10	8	39	51	35976	14	7	8	6	20	3	9	2	9	10	115	315	43	42	107	38	57	1386	14	4	13	94	24	24	189	60
MET-766	31	39	62	51	14	77	35	37	17	20	4	18	68	17892	9	15	16	8	21	20	7	2	10	8	54	602	71	61	89	39	32	613	82	7	22	109	18	17	105	47
MET-767	29	22	69	42	19	16	16	2	48	9	2	16	46	6978	18	17	9	5	11	23	20	5	10	10	42	152	45	39	99	24	21	157	40	7	23	47	15	17	31	38
MET-771	9	16	17	12	6	8	18	3	16	11	8	24	19	640	13	12	18	2	30	19	9	8	10	20	15	48	14	31	14	5	13	36	9	5	9	18	24	7	18	22
MET-772	19	29	23	17	17	8	10	4	19	9	4	24	11	381	22	7	17	4	54	4	14	5	2	5	8	22	13	17	16	8	9	130	1	5	35	40	9	21	44	16
MET-774	7	11	17	2	5	20	5	4	11	8	2	10	17	667	13	14	5	6	69	5	3	1	7	9	9	21	8	14	7	12	96	82	1	4	6	73	9	12	57	71
MET-775	33	23	177	13	13	255	14	36	26	20	8	47	54	3992	17	14	9	5	141	18	12	4	7	20	26	116	22	30	50	20	148	271	5	5	10	170	49	30	100	98
MET-776	24	19	31	5	3	541	3	189	28	9	8	180	36	3806	23	14	9	10	297	9	6	5	74	15	66	481	41	81	50	149	93	1409	4	4	9	1193	163	98	425	255
MET-777	40	14	82	11	43	883	7	143	333	22	4	1425	52	7791	48	3	11	65	111	8	5	9	351	33	41	285	150	88	52	103	145	2252	8	7	36	875	228	119	463	375
MET-778	88	49	674	20	27	1124	182	142	67	26	4	42	119	19777	55	30	28	18	74	60	6	7	41	23	91	156	74	49	128	55	125	422	129	25	20	184	72	20	155	148
MET-779	13	26	40	29	14	108	23	6	32	20	6	26	45	14796	19	11	16	1	38	18	14	21	4	6	57	56	35	41	28	27	18	711	20	12	25	66	16	23	52	23
MET-780	117	73	166	24	42	610	31	95	66	42	11	228	66	13539	31	10	24	27	313	35	38	19	20	17	150	837	102	96	54	130	85	1615	24	17	85	451	63	132	444	316
MET-781	79	53	412	29	58	38	22	67	228	10	3	117	74	2881	15	11	35	10	33	10	7	10	49	25	21	266	39	70	268	58	104	126	12	10	7	224	34	79	160	162
MET-782	53	19	421	16	26	2849	21	255	75	33	5	165	59	82287	15	7	10	31	153	14	7	5	35	13	478	263	239	66	49	98	214	833	5	2	6	789	125	75	545	331
MET-800	94	29	126	526	53	564	27	700	120	23	10	681	126	1468	32	17	28	83	1144	25	36	18	63	34	383	1381	163	189	113	439	41	1246	49	29	39	1062	304	120	1016	323
MET-801	26	5	142	13	8	1331	3	161	7	8	3	50	45	10207	16	6	6	16	429	4	3	1	6	6	218	291	51	42	39	89	267	1807	1	10	22	194	89	51	159	90
MET-802	15	2	61	24	6	231	4	59	31	8	0	33	16	979	2	0	0	1	1346	5	0	0	6	0	51	79	28	7	12	22	5	414	8	2	6	66	13	5	44	17
MET-803	175	78	896	149	78	9092	102	1136	96	52	12	366	441	63886	55	43	85	251	1219	34	17	3	94	181	1633	1405	423	214	405	368	86	10809	79	62	29	392	220	111	594	279
MET-804	79	24	187	68	37	6770	19	664	25	31	15	58	120	21041	90	10	39	37	2157	3	3	10	27	13	670	997	191	173	105	623	494	4876	26	29	45	812	486	135	771	294
MET-805	91	16	90	73	49	9894	66	1004	48	67	3	40	128	73625	156	16	16	36	8998	20	8	4	26	24	1878	573	316	96	92	134	126	4939	40	10	189	311	161	102	335	203
MET-806	93	13	502	59	139	852	44	396	86	31	2	510	155	7414	80	6	12	63	289	14	6	7	63	38	288	433	121	109	47	91	33	820	23	13	11	509	118	93	308	152
MET-807	592	92	3483	363	799	562	118	951	237	67	11	1802	780	6285	308	664	101	276	5366	30	19	30	407	172	188	1350	841	341	429	339	268	1704	78	74	40	701	302	117	957	383
MET-808	40	6	125	23	60	235	9	97	30	3	4	116	22	1322	8	1	5	16	65	3	1	4	15	8	69	76	64	21	10	19	4	220	12	1	0	131	28	31	110	23
MET-809	1261	382	6224	551	1637	1204	487	911	552	147	18	2513	1866	9499	148	108	235	235	27	264	32	28	689	135	308	858	2665	408	1173	377	34	1590	1211	152	27	2237	861	602	3084	911
MET-810	430	118	1898	320	114	614	267	591	220	92	9	414	617	4028	203	36	140	107	66	120	19	13	278	38	100	332	1171	164	507	159	16	1055	549	84	31	960	365	231	2236	558
MET-811	1	2	1	1	1	0	0	0	3	1	1	4	0	86	3	2	1	1	1	4	0	1	3	2	1	5	0	1	0	2	1	2	1	0	1	0	7	1	3	2
MET-812	111	20	122	20	55	18471	12	944	51	15	11	67	138	204907	132	20	12	507	446	3	12	2	59	83	8377	1753	457	92	92	247	30	6517	7	14	18	797	269	144	1242	368
MET-813	350	28	344	54	60	51	32	809	269	14	8	247	453	16808	544	39	30	169	2417	4	29	7	74	35	878	4471	181	120	148	461	273	2326	11	27	67	653	182	126	807	450
MET-814	79	23	726	30	31	122	14	220	35	10	4	272	88	2026	72	13	21	116	6	2	5	2	24	33	244	416	55	53	79	126	248	806	11	4	6	140	21	11	71	29
MET-815	31	15	7	12	15	10660	24	1351	204	7	3	11	23	6721	51	2	5	105	1209	5	6	1	563	20	2808	599	977	45	39	141	706	1300	10	11	330	1489	586	290	1284	637
MET-816	99	57	545	60	47	140	51	60	54	7	1	30	263	7688	45	51	21	26	51	19	3	6	80	65	30	362	112	64	399	132	24	145	22	10	16	85	11	7	72	121
MET-817	100	85	37	14	50	2354	13	329	14	16	29	137	199	11995	13	8	17	94	27	9	29	0	38	15	630	480	97	73	69	227	129	1881	15	13	22	817	323	293	754	384
MET-818	255	31	254	105	84	28026	49	1814	51	21	134	162	631	54552	285	33	57	94	1288	13	32	6	50	15	1333	2503	241	140	218	1308	53	3098	26	59	109	908	345	192	1181	497
MET-819	57	37	31	20	26	4186	14	1015	11	41	12	45	86	37434	95	16	192	102	295	5	9	1	164	25	1817	927	230	133	109	329	682	8321	11	10	27	2359	649	405	2183	626
MET-820	16	10	13	0	3	1505	6	92	5	1	5	4	22	15254	3	2	1	16	22	0	1	1	5	3	242	142	8	10	15	69	7	579	4	2	3	45	27	15	58	34
MET-821	60	32	63	41	10	139	11	297	68	3	1	17	83	808	11	13	26	7	8	4	4	6	31	16	17	129	56	10	122	1671	757	765	5	9	4	119	69	35	181	108
MET-822	288	29	132	9	83	493	64	3653	110	6	12	177	250	1997	250	11	18	54	160	5	11	5	38	37	52	1082	317	63	168	832	5364	1660	9	43	54	603	230	103	417	289
MET-823	396	129	673	74	87	76	56	1420	264	11	19	624	667	531	24	56	59	43	94	7	15	16	132	43	23	2003	270	83	563	1031	4290	306	33	33	55	610	189	92	833	384
MET-824	551	120	1190	167	137	370	70	3431	382	34	3	708	579	2388	18	28	74	126	55	11	29	6	91	59	77	1400	631	110	391	319	9042	1995	49	75	18	759	265	133	649	346
MET-825	462	106	583	82	129	7774	62	3089	326	22	13	264	741	35023	101	46	79	131	249	19	18	16	100	42	780	2391	702	194	398	842	3199	9405	71	68	44	643	246	108	521	294
MET-826	25	12	665	24	21	433	14	91	24	10	1	82	55	2029	51	3	11	11	393	6	1	1	12	7	52	180	47	36	46	52	210	329	7	8	9	45	40	14	112	54
MET-827	45	15	26	22	13	425	27	158	8	7	4	19	59	580	18	11	23	18	211	5	10	1	25	8	33	177	37	59	53	45	24	917	5	7	18	157	54	31	208	120
MET-828	8	5	3	5	2	21	9	5	3	3	1	3	5	3193	3	6	5	4	34	6	3	1	6	8	3	82	7	16	20	8	41	148	2	0	2	18	10	3	14	52
MET-829	33	8	69	37	9	61	20	152	42	13	3	104	41	349	13	7	11	27	895	4	4	1	10	14	9	608	60	108	30	69	60	281	8	3	33	193	95	53	539	143
MET-830	17	7	21	9	9	104	9	40	4	4	1	13	11	361	8	4	2	3	88	4	0	0	5	4	9	94	15	6	7	9	26	132	7	2	8	38	29	29	77	37
SUPER-1005	487	1012	1663	561	997	3247	375	1309	1788	114	15	9942	804	10895	79	36	109	202	474	166	46	32	279	181	605	693	950	342	453	400	225	4412	840	78	348	1449	315	122	539	294
SUPER-1006	114	37	130	12	60	104	17	390	12	11	8	112	284	12199	10	8	19	52	15	9	12	20	34	13	81	231	135	43	89	129	75	5994	7	8	11	664	147	85	498	215
SUPER-1009	91	20	77	34	29	674	39	599	12	13	13	65	44	15375	232	12	16	53	3772	15	8	16	11	261	372	1686	309	98	44	315	48	694	34	10	56	612	266	53	737	309
SUPER-1010	90	35	43	30	58	3690	15	1370	48	17	21	223	128	48413	1538	20	19	98	9657	11	8	8	64	65	218	308	413	102	95	209	68	9262	8	9	180	952	230	73	619	195
SUPER-1013	192	117	1429	205	205	807	228	256	283	86	38	799	322	9114	79	46	70	50	144	104	34	37	135	44	232	378	210	221	301	148	272	783	451	43	102	383	105	119	281	152
SUPER-1015	163	106	1350	272	223	1195	281	464	147	79	77	640	221	3220	103	22	123	101	260	127	91	122	48	28	311	271	702	330	263	151	723	1378	368	81	969	1649	332	304	1036	389
SUPER-1016	520	52	1842	209	869	5519	122	603	699	53	50	719	504	10507	436	64	34	173	2150	61	43	31	158	75	450	461	497	246	148	258	88	2259	36	48	891	884	222	96	702	167
SUPER-1017	16	6	52	4	7	1678	16	96	140	2	0	205	20	14137	16	0	5	17	66	3	0	2	5	8	290	79	18	19	11	46	21	295	8	1	5	92	14	11	96	18
SUPER-1021	402	157	4549	477	618	2884	399	1108	762	99	28	2016	908	39169	92	33	167	277	869	165	15	44	289	139	1003	1409	618	392	721	528	167	859	688	58	94	1226	314	100	649	266
SUPER-1022	263	655	1401	239	368	655	413	505	243	75	29	1014	351	4847	115	24	75	103	221	179	46	70	118	79	233	298	371	203	239	166	80	919	896	57	103	492	104	91	418	116
SUPER-1023	245	163	691	234	298	470	729	664	277	157	61	359	264	690	189	45	66	77	186	425	201	125	59	27	213	396	289	308	223	220	115	744	2264	92	154	1215	262	309	914	257
SUPER-1024	1709	523	8404	496	1539	795	160	1359	6406	80	75	2653	3108	4479	99	117	253	496	221	82	116	119	1694	579	321	2055	771	487	2214	1030	217	1148	205	138	45	2441	526	106	1271	374
SUPER-1026	375	107	7182	310	220	4796	62	1099	2232	88	36	3555	730	24117	29	103	127	335	616	18	20	25	189	121	1673	1275	287	190	324	550	110	2013	48	60	302	1124	330	110	943	337
SUPER-1027	86	40	136	61	64	1974	65	660	42	24	17	283	124	15992	125	20	49	76	185	25	19	33	32	30	445	1133	93	126	106	317	42	2560	43	16	125	501	137	72	400	105
SUPER-1030	324	268	402	372	237	2450	76	392	277	79	135	356	419	24799	199	85	76	78	509	188	328	276	82	12	1379	259	401	684	419	271	435	3772	198	153	353	2491	520	514	1765	699
SUPER-1031	91	32	535	45	132	4745	35	775	1884	22	23	631	180	36312	217	21	26	71	689	10	14	7	51	23	1602	514	89	103	86	219	78	2513	18	18	61	999	297	107	787	220
SUPER-1032	338	53	2012	144	421	576	36	612	651	27	6	2546	692	1182	217	12	55	153	3310	13	22	31	311	132	130	843	242	202	304	323	177	515	48	34	26	380	114	31	339	93
SUPER-1033	82	34	19	82	161	205	69	331	44	14	13	396	192	308	189	9	230	63	1838	23	5	3	35	54	13	828	218	229	92	432	4	525	100	18	35	689	191	78	343	142
SUPER-1034	252	42	50	59	233	2028	48	567	30	10	21	138	242	16396	7725	15	23	81	48138	29	12	17	63	145	1156	3147	583	305	236	1467	10	1097	101	44	1044	638	194	67	506	170
SUPER-1036	364	131	2757	226	602	1536	1089	1146	1063	102	26	2023	804	10129	516	59	81	148	1253	467	37	29	181	66	229	876	383	367	478	272	48	1286	2584	43	186	779	189	116	547	212
SUPER-1039	359	525	1050	687	624	550	863	879	1186	188	74	1206	1054	2706	291	70	127	181	964	458	162	149	209	227	265	480	711	644	399	360	233	1598	2318	109	358	1312	284	254	666	261
SUPER-1042	139	61	602	168	179	2523	174	537	172	124	32	291	318	15306	70	22	48	57	2293	74	70	71	50	38	645	857	538	239	229	241	60	2588	134	46	67	440	94	122	356	78
SUPER-1051	199	76	499	233	630	356	655	740	331	72	6	492	291	2621	49	27	68	859	31	217	20	13	76	178	105	357	121	190	228	168	22	668	1335	30	64	497	149	36	206	133
SUPER-1053	122	36	107	66	137	1380	73	1532	49	12	18	445	583	2325	119	11	20	130	3706	13	17	12	75	47	204	1860	374	309	143	704	448	1679	27	36	408	741	229	51	323	152
SUPER-1055	79	28	77	32	37	1670	20	322	31	18	12	68	108	18687	27	12	16	34	1077	9	9	12	45	15	216	554	112	46	60	119	48	1620	6	21	17	392	125	70	315	153
SUPER-1060	24	9	11	7	12	29	8	531	6	33	6	24	9	451	2	9	4	23	874	8	5	6	9	10	19	180	62	54	40	110	255	430	11	7	11	1714	327	136	1246	228
SUPER-1061	21	14	15	5	6	4	8	239	59	0	4	340	14	40	1	3	4	23	8	1	3	1	14	29	11	426	30	80	26	74	18	300	3	4	0	230	63	43	251	88
SUPER-1063	119	81	1919	146	117	5080	73	1122	129	33	19	1318	419	26143	38	30	68	141	560	35	13	17	102	33	1031	543	401	219	276	326	1201	6453	158	16	60	1622	356	117	1294	342
SUPER-1067	65	31	61	53	47	266	30	233	40	19	14	50	98	2137	35	3	15	13	99	20	15	22	7	18	64	184	91	72	41	62	110	566	30	16	41	130	51	42	140	61
SUPER-1069	253	102	2057	223	629	2728	233	1561	378	89	17	1313	513	19011	41	37	65	189	215	65	25	20	49	54	798	1176	389	203	206	372	133	2445	224	44	81	1140	286	91	896	282
SUPER-1070	179	59	792	251	289	3583	219	1168	264	53	11	1085	486	28713	291	19	59	135	372	81	24	18	62	49	598	537	441	90	211	213	18	5934	314	37	434	936	221	99	492	250
SUPER-1071	222	152	386	212	181	159	118	10	193	115	65	226	292	1418	134	72	55	9	194	81	169	161	40	21	181	295	147	331	489	124	112	208	227	83	151	512	4	206	240	64
SUPER-1076	102	30	1471	155	54	13184	143	994	237	67	13	2490	267	59080	62	22	52	244	532	34	13	43	48	71	3209	626	490	247	106	426	232	13598	174	35	161	3362	429	168	917	232
SUPER-1081	482	113	4523	201	306	9835	123	1092	1122	50	7	2994	485	114848	48	51	79	203	334	24	11	16	181	75	748	1422	327	456	471	598	141	3309	78	38	28	651	202	120	345	284
SUPER-1084	151	30	534	86	3526	621	24	687	114	49	13	389	154	9897	29	30	26	43	221	13	5	23	78	22	230	440	350	120	92	82	158	1616	34	8	19	1881	405	169	1395	269
SUPER-1085	2037	408	11295	381	4644	2438	25	871	2823	88	32	5469	3714	16538	83	117	280	372	4747	9	10	208	1141	227	1069	1515	497	376	1696	1082	102	2069	38	130	107	1204	341	127	926	294
SUPER-1088	56	253	147	26	36	4636	14	678	66	26	20	244	168	41157	90	11	57	62	547	4	1	1	37	22	1135	990	283	223	61	315	52	2465	5	9	39	674	275	140	807	288
SUPER-1090	29	15	49	12	20	647	138	358	19	9	15	38	55	203299	11	18	8	36	43	24	3	2	7	11	185	748	100	27	25	124	156	667	28	6	10	257	92	38	222	86
SUPER-1092	109	28	1686	105	93	977	343	1285	144	37	7	957	259	1798	71	18	59	121	211	176	8	8	91	39	364	542	442	197	52	181	157	4771	590	21	9	614	196	91	875	221
SUPER-1093	493	91	3996	570	943	1587	808	1386	960	104	11	2384	653	13346	698	24	164	241	282	333	10	18	167	179	506	749	807	289	296	385	31	1494	1805	50	104	921	201	108	687	166
SUPER-1094	54	18	40	27	35	9764	48	1219	42	19	15	143	112	25431	96	13	11	72	15569	9	5	9	15	21	1586	732	311	294	75	344	460	3895	43	9	17	897	322	154	800	247
SUPER-1095	87	20	117	29	44	260	65	804	25	19	36	401	89	1448	832	6	9	124	76205	25	4	12	65	44	42	7567	492	144	65	1976	14	458	107	6	677	947	364	74	556	170
SUPER-1097	596	285	2105	277	69	594	94	640	2881	30	17	706	618	7102	59	56	343	109	81	21	7	64	535	74	99	1113	192	215	1041	449	153	632	102	67	19	356	131	73	292	147
SUPER-1098	29	38	402	82	51	990	397	198	65	33	0	137	140	2913	7	11	22	38	70	148	4	6	18	22	254	202	70	68	65	76	84	1166	910	16	10	255	72	28	144	70
SUPER-1100	0	5	0	1	0	35	0	9	1	3	1	5	4	1188	2	2	0	1	216	2	2	0	0	2	20	22	6	1	6	7	12	66	0	0	6	14	4	3	7	4
SUPER-1101	50	10	15	27	46	9	366	56	12	15	3	36	45	167	16	4	14	7	303	129	2	0	25	10	9	67	16	20	33	22	0	26	915	2	3	91	22	7	54	15
SUPER-1102	242	47	330	55	132	4650	85	1008	61	41	28	136	398	20982	37	31	33	133	1697	24	37	4	73	39	410	1731	272	119	104	263	151	3252	72	30	265	1999	388	213	1144	411
SUPER-1103	45	10	44	43	49	597	76	421	38	20	15	37	45	2211	94	13	21	106	3072	32	7	2	141	203	270	246	208	132	201	123	110	590	120	16	48	1787	351	169	1289	477
SUPER-1104	900	275	2386	313	1170	2327	727	2317	4547	120	23	1028	1904	21081	1671	25	169	179	1365	579	52	47	374	65	788	840	1546	264	444	413	227	2165	1866	97	1419	2344	744	307	2318	488
SUPER-1105	32	22	59	21	24	6509	23	1512	6	27	12	48	16	63937	150	19	18	85	199	11	8	22	39	31	1887	706	191	78	241	170	297	5866	9	4	739	1465	718	417	2319	655
SUPER-1107	28	11	69	20	17	1948	6	522	33	8	1	63	33	22591	57	6	6	56	53	8	8	34	25	17	20	202	123	93	105	90	354	4405	13	13	14	1314	293	159	887	286
SUPER-1108	1441	251	11930	1860	1306	1954	2072	1762	2239	425	23	11489	1672	8521	89	88	287	514	1744	1117	29	19	1141	195	660	1981	1061	961	1418	749	111	685	6606	221	82	1434	478	183	779	310
SUPER-1109	204	10	493	45	281	678	25	162	208	8	3	152	219	2832	125	9	19	47	8470	17	0	7	36	69	159	328	110	27	80	64	55	282	25	14	122	105	71	23	135	43
SUPER-1110	215	89	846	191	70	5635	432	374	122	31	16	306	223	11011	37	16	50	81	135	96	21	21	72	30	535	530	271	196	446	190	169	876	761	24	15	727	207	128	538	279
SUPER-1111	284	130	482	65	388	11687	152	1637	119	45	23	192	587	103086	80	32	40	165	193	33	6	11	59	25	1524	1336	225	128	358	495	72	681	170	55	20	1004	271	177	811	261
SUPER-1112	208	34	264	115	586	7161	54	832	124	42	11	897	221	50441	1821	13	143	181	32734	9	13	5	88	274	1885	824	820	222	143	359	798	4714	50	18	330	581	236	119	619	259
SUPER-1113	525	139	1094	204	346	63	242	450	2833	41	20	500	859	245	24	23	73	174	67	112	16	20	253	297	34	808	128	176	301	334	45	68	460	42	49	266	137	43	226	146
SUPER-1114	145	27	292	248	370	6652	53	1056	181	110	12	1353	512	74740	58	24	47	117	269	7	3	4	112	85	2379	991	211	349	84	352	130	1592	50	15	33	677	241	63	744	171
SUPER-1117	145	32	943	77	146	1828	261	457	75	29	8	364	158	7516	42	9	31	106	676	102	16	18	54	183	405	363	190	100	126	137	181	885	291	17	21	997	233	200	533	179
SUPER-1118	490	79	5193	102	477	2418	93	868	472	28	12	1119	538	28013	311	27	34	355	7165	24	15	42	126	236	289	741	340	217	485	271	391	1263	56	43	1695	791	226	226	698	301
SUPER-1119	37	589	25	22	78	68	21	685	53	33	8	92	66	2134	96	7	10	88	298	11	29	3	4031	47	3001	936	107	83	59	153	739	2590	11	10	717	2864	608	340	1808	427
SUPER-1120	916	71	352	207	1322	61	122	168	761	24	7	79	818	317	42	54	70	18	3128	91	4	41	529	30	22	210	333	52	361	246	31	1295	132	27	480	637	84	37	407	167
SUPER-1121	423	22	3993	168	144	1733	36	350	180	31	3	932	599	14598	157	32	249	95	2137	8	4	12	147	56	138	739	138	648	194	332	150	547	21	19	1231	445	127	85	379	259
SUPER-1122	18	6	60	5	9	419	13	74	13	3	3	29	34	2296	6	6	1	6	831	5	3	2	3	6	34	189	32	10	11	21	51	252	7	1	8	191	100	13	207	60
SUPER-1123	4	3	6	7	3	2	1	0	1	0	2	2	0	5	2	2	5	1	7	0	7	1	2	11	1	4	1	2	2	3	2	3	0	0	5	0	6	0	7	2
SUPER-1125	25	359	7	2	5	315	2	153	2	0	0	10	9	4933	3	0	8	27	32	3	4	3	11	4	8	57	62	39	28	37	596	1541	6	4	9	439	117	60	517	210
SUPER-1126	5	8	52	6	7	109	9	16	8	3	2	22	11	2246	7	5	2	6	60	3	0	2	10	9	6	26	10	18	6	16	23	112	1	0	2	51	7	7	16	21
SUPER-1129	0	2	0	6	5	8	4	2	1	1	2	1	1	147	2	4	1	0	18	0	0	1	1	5	3	2	2	2	0	1	1	21	0	0	1	10	9	1	6	7
SUPER-1130	172	7	25	4	30	885	9	822	5703	7	10	48	85	4968	104	7	7	54	232	3	2	15	13	8	281	432	105	80	34	121	917	961	7	12	6	1127	152	151	542	195
SUPER-1131	9	1	4	2	2	26	7	10	9	1	1	5	32	376	0	0	1	3	47	7	8	0	2	3	12	41	10	2	5	5	5	57	26	0	3	42	22	8	55	7
SUPER-1132	32	8	82	9	17	1321	2	185	374	10	2	115	59	20486	30	3	1	16	330	3	2	3	32	10	529	242	99	38	34	45	122	1329	2	5	150	198	72	48	284	121
SUPER-1133	52	6	63	21	23	4935	14	501	9	7	2	56	169	49017	58	4	4	28	229	10	3	2	23	6	878	402	87	72	45	165	465	1938	17	4	15	309	122	34	340	89
SUPER-1135	35	4	24	7	11	476	11	267	11	8	3	49	86	59995	9	12	5	24	161	6	4	10	21	13	172	820	105	38	29	107	158	724	7	9	24	489	182	49	410	127
SUPER-1136	91	39	792	54	50	4506	24	584	235	20	8	1131	285	39152	72	20	24	84	673	2	6	6	130	74	1219	630	115	236	171	260	133	2922	11	14	93	500	169	63	362	157
SUPER-1137	379	46	3532	164	539	8672	82	710	1750	40	9	4635	571	59648	70	33	58	361	4394	28	3	25	222	142	1863	1391	622	281	153	402	213	2857	66	23	52	583	254	85	526	143
SUPER-1141	1124	80	4187	331	1606	198	94	1394	1529	36	7	3056	852	1082	475	32	84	414	3218	50	20	210	867	393	87	1498	381	191	673	329	35	292	107	140	395	507	166	98	480	109
SUPER-1144	265	48	272	80	340	4545	218	1773	65	51	8	171	459	11870	2269	13	18	86	14310	66	11	4	47	45	727	901	601	138	152	257	97	1201	101	23	681	570	263	69	685	151
SUPER-1145	64	24	309	48	58	1136	26	493	136	34	2	157	147	9981	31	14	6	38	691	11	3	7	16	37	275	336	185	79	31	84	439	892	14	10	41	572	159	43	452	87
SUPER-1147	281	56	1185	99	301	1154	93	869	1042	27	2	1597	244	7650	127	18	26	105	3523	41	16	10	54	62	438	1002	458	101	125	294	130	1592	152	20	26	543	179	72	616	152
SUPER-1149	159	61	226	230	175	3863	805	1038	110	63	9	134	471	12538	111	33	41	78	6154	322	21	6	49	22	881	613	332	121	173	184	114	3906	1800	34	412	590	214	105	471	131
SUPER-1150	180	53	1065	24	62	903	35	152	25	13	4	265	180	3825	6	11	30	63	741	2	10	6	66	16	41	193	57	67	260	88	43	262	20	21	13	792	152	97	446	169
SUPER-1151	81	111	23	526	250	496	13	433	5	8	10	24	51	3413	10	8	27	6	224	5	12	5	89	30	91	340	972	15	67	71	21	904	33	10	119	1385	306	139	1117	382
SUPER-1153	160	18	112	161	274	1825	157	502	102	31	4	124	206	5441	875	16	40	114	1654	64	3	4	110	171	436	448	132	104	104	140	128	1712	240	10	718	378	152	37	326	95
SUPER-1154	136	45	95	31	10	2658	38	356	7	9	10	163	317	33433	5	28	31	17	224	12	8	3	30	9	926	808	89	69	140	220	66	4268	90	15	20	601	163	66	379	133
SUPER-1155	72	6	124	7	45	1224	14	664	60	12	4	112	101	6722	32	3	9	29	278	4	3	6	19	17	234	530	90	54	16	99	246	826	6	12	40	810	278	69	584	151
SUPER-1156	66	308	25	60	43	1466	27	240	29	25	12	65	53	17246	37	11	9	25	4996	16	8	5	28	19	124	741	319	65	53	95	164	1968	47	3	138	1107	252	100	802	201
SUPER-1157	571	258	10032	442	711	1051	1648	1336	623	163	20	1858	1324	6452	80	88	131	208	67	663	36	17	223	87	519	552	332	271	529	292	63	873	3959	160	5	1157	449	154	722	229
SUPER-1159	13	404	16	6	8	790	2	174	4	5	3	29	34	3433	25	4	14	12	15	0	2	1	23	4	66	116	106	12	28	29	25	3226	0	3	13	296	48	45	184	88
SUPER-1160	13	5	23	8	6	840	9	170	15	1	2	50	22	2927	18	2	6	11	1350	4	5	3	12	10	99	293	18	30	19	48	19	527	0	0	48	488	76	47	174	94
SUPER-1161	32	6	236	12	44	147	21	202	19	5	1	99	45	357	1	7	6	9	51	11	1	7	20	9	26	157	44	10	50	28	26	110	37	0	3	311	50	52	247	75
SUPER-1162	54	23	1848	58	68	11265	10	1629	203	20	7	1454	133	56880	39	6	28	109	598	8	6	48	43	30	1438	1655	190	137	47	167	212	4687	24	37	19	1032	212	133	500	216
SUPER-1163	0	3	36	2	2	400	2	73	3	5	4	43	6	2478	0	2	2	0	25	1	2	1	2	0	29	100	12	8	10	7	10	186	0	1	3	53	9	4	46	22
SUPER-1164	26	4	723	15	40	611	4	259	89	1	3	520	45	869	3	10	2	9	31	1	8	2	9	16	37	86	31	15	20	12	5	1156	5	7	5	142	26	18	76	30
SUPER-1165	45	8	392	21	37	365	13	239	123	9	1	401	89	1169	43	3	0	42	58	0	2	6	28	21	52	159	47	26	39	36	17	271	9	9	3	126	14	18	67	38
SUPER-1167	6	0	12	6	5	769	4	145	3	4	0	12	11	3638	14	6	1	9	598	0	4	0	1	3	75	144	19	7	3	23	8	395	1	0	22	78	26	7	47	30
SUPER-2001	106	66	1755	160	64	5549	114	1919	318	64	9	2704	328	21781	53	13	48	134	1171	45	8	9	52	46	1446	1319	299	236	254	398	166	3133	285	34	22	815	341	131	1099	287
SUPER-2003	85	38	961	139	47	10300	42	1547	127	95	7	1865	149	97732	65	9	44	196	790	10	14	14	44	47	4138	1501	266	349	75	559	380	3753	33	20	12	1344	303	81	760	249
SUPER-2004	285	118	1290	335	299	1781	956	1785	826	154	34	678	522	19184	66	42	62	182	6999	353	38	12	56	198	696	987	426	308	268	335	26	1007	1854	70	82	1650	414	77	550	265
SUPER-2005	155	63	552	119	101	2170	37	656	48	44	5	938	293	11136	49	14	51	98	5189	3	6	11	124	54	418	1331	89	217	177	391	104	1295	18	22	113	512	170	72	441	149
SUPER-2010	101	21	635	93	62	2168	52	736	3257	32	12	1048	245	12190	21	22	11	170	1024	8	19	8	69	67	570	1023	97	230	131	405	135	1693	37	31	110	1964	320	78	596	210
SUPER-2011	53	20	105	60	34	1787	79	782	47	20	5	147	124	5110	14	7	17	49	4836	28	7	7	21	21	360	437	157	79	57	112	47	2828	83	13	19	743	212	42	384	130
SUPER-2016	165	69	1162	193	132	3069	86	1386	189	72	2	1489	534	22365	60	42	47	206	384	110	13	21	224	57	1301	659	756	198	204	306	763	3312	80	45	46	1935	504	338	1993	632
SUPER-2017	104	20	1253	73	57	6032	59	1218	736	38	8	1040	407	17348	83	13	39	101	1328	16	13	14	67	53	956	1080	172	191	87	335	460	3148	80	30	21	1825	420	199	1278	321
SUPER-2018	120	30	547	68	132	177	230	374	84	25	1	208	105	946	17	14	18	25	29	81	17	5	49	17	30	165	133	47	79	53	47	83	283	26	14	145	79	18	121	47
SUPER-2019	2	5	13	4	5	217	1	32	1	3	3	30	14	1104	4	1	2	2	268	0	1	0	3	8	20	178	7	18	6	37	13	74	0	1	2	73	51	19	129	34
SUPER-2021	97	23	146	45	54	9593	20	620	60	19	14	88	152	94561	50	17	14	80	687	1	7	5	27	12	1013	595	76	123	107	252	97	3468	8	21	10	401	148	78	403	219
SUPER-2023	814	20	45	29	40	17058	15	1098	30	36	11	81	206	78252	82	11	21	278	3481	4	9	4	21	103	3544	1839	241	394	56	673	411	8310	16	6	235	741	249	117	672	230
SUPER-2024	26	8	325	42	24	4105	38	279	69	24	1	448	106	62987	10	7	12	34	969	9	5	2	13	31	717	212	81	118	36	78	80	1407	11	3	15	217	74	24	162	67
SUPER-2025	590	152	8766	345	659	2388	525	1691	705	119	18	2870	1452	14734	147	65	136	178	234	274	21	40	286	113	446	708	497	438	455	307	472	3423	1163	86	46	1506	627	236	1120	492
SUPER-2026	114	1170	34	20	236	444	7	94	3	5	2	15	19	3935	61	2	21	22	1687	3	5	5	14	11	57	80	208	25	57	32	58	756	1	4	49	167	57	22	181	64
SUPER-2027	38	95	410	14	15	3647	8	140	5	6	4	42	50	9363	29	7	5	10	1073	4	3	4	20	23	404	236	22	36	27	66	67	1533	2	5	28	729	196	68	822	165
SUPER-2028	208	18	628	71	204	834	18	499	151	15	6	658	229	7562	71	14	26	668	754	4	21	6	120	1096	1856	1633	266	135	347	229	935	965	15	19	28	886	330	73	1604	473
SUPER-4001	1184	166	4654	670	1772	1373	72	1546	519	263	24	12402	1558	3229	133	72	186	482	116	15	38	63	1329	395	502	1908	384	4000	614	852	41	381	18	67	28	1106	270	66	603	302
SUPER-4002	39	33	38	57	64	47	86	35	12	32	53	56	61	32	24	16	26	9	1480	40	34	20	11	3	25	338	59	63	61	81	25	40	45	23	56	241	24	40	105	37
SUPER-4003	738	44	34	95	1040	1530	53	2385	147	20	39	140	344	10155	3730	18	45	48	79454	27	15	12	66	76	794	2488	486	611	309	2076	14	1289	47	45	889	905	444	81	511	118
SUPER-4004	70	38	48	46	27	4807	48	619	5	45	14	24	112	17661	17	19	11	24	4366	14	16	8	19	21	664	685	134	64	76	172	46	3465	33	26	45	352	118	84	447	242
SUPER-4007	297	392	2451	79	301	584	33	298	195	25	19	21918	909	3620	83	16	35	215	4454	9	6	24	97	352	117	398	162	181	187	233	282	250	30	21	161	1364	264	88	1051	384
SUPER-4010	482	107	8884	324	426	1559	717	1072	594	105	18	2220	822	14025	106	38	76	198	487	290	32	38	187	129	213	1268	388	309	653	341	26	1555	1049	50	84	1177	251	114	451	263
SUPER-4011	555	146	6733	325	887	3091	295	1473	1081	58	58	5335	1100	4375	381	45	138	449	4484	181	34	64	248	197	1048	1532	498	264	556	631	434	5364	468	76	185	1971	346	129	1119	387
SUPER-4012	253	61	1582	312	530	8687	338	2493	1366	90	25	1360	515	34365	318	22	95	352	1676	147	17	22	87	92	2468	1108	1650	279	176	432	198	7069	401	48	386	1212	464	130	959	328
SUPER-4013	1335	484	5823	310	523	1871	69	2268	366	51	39	6389	3079	14208	367	153	563	713	389	11	20	109	1406	312	652	5119	531	545	1803	1997	138	2565	25	60	28	2188	678	234	1719	672
SUPER-4014	340	120	3227	366	717	2897	622	819	719	158	14	1545	491	11960	125	32	62	184	4670	255	13	36	214	126	397	1020	250	280	317	338	123	1651	1092	38	320	534	301	168	761	265
SUPER-4015	61	17	416	33	36	3561	12	356	27	16	5	449	128	17232	56	8	21	221	163	0	3	9	67	157	2399	612	162	108	78	201	303	1357	6	11	8	643	225	131	581	141
SUPER-4016	14	6	51	15	12	2167	8	793	20	12	4	114	20	33280	18	3	4	79	22	4	6	2	18	10	1102	198	175	41	10	78	163	4086	4	3	11	422	133	66	437	121
SUPER-4018	78	7	27	2	14	541	21	146	3	13	9	71	84	1792	9	5	3	19	942	0	27	2	17	13	39	247	17	25	21	52	13	145	8	8	6	155	59	32	200	50
SUPER-5003	37	21	41	35	37	39	35	16	19	11	16	25	38	6244	65	10	15	7	359	15	14	25	7	32	23	623	41	79	60	33	50	85	20	15	24	131	13	39	123	35
SUPER-5005	183	27	271	70	59	5501	48	1288	157	52	27	1229	558	30524	163	15	41	183	4338	15	29	14	87	150	924	2193	190	569	118	774	67	2072	24	34	22	686	267	83	603	207
SUPER-5009	88	121	107	134	124	159	82	245	24	50	61	138	80	9268	64	14	40	13	3166	49	63	93	14	12	112	281	343	142	161	129	252	765	63	46	187	467	68	128	469	134
SUPER-5010	627	219	17801	590	1054	1722	245	1302	12063	163	15	24269	1226	8793	130	48	204	481	163	133	7	107	802	453	678	1209	821	682	729	630	213	993	243	72	17	959	288	144	918	232
SUPER-5011	1185	263	4854	317	433	12176	103	1698	2237	110	18	4695	1454	34155	327	103	240	562	2178	28	16	94	593	126	1490	2564	647	603	1188	1140	355	5517	62	63	15	1376	529	335	1356	544
SUPER-5013	60	17	159	54	32	825	13	357	58	11	9	120	133	1737	10	3	18	40	506	3	8	9	25	22	137	933	121	80	78	176	109	3148	10	8	56	650	420	148	831	323
SUPER-5014	33	13	69	18	14	843	9	472	7	10	5	89	98	10378	10	4	18	32	5299	3	1	0	17	16	313	383	54	122	39	128	183	1680	5	7	8	1104	259	125	614	246
SUPER-5015	144	2885	180	261	268	3264	20	718	63	64	4	214	152	34156	60	20	213	164	2082	8	12	7	100	47	1341	431	2010	147	226	225	492	10230	9	6	449	1604	557	171	1752	397
SUPER-6002	347	97	1903	127	433	2454	172	790	588	35	9	1079	559	8452	345	16	90	172	657	65	17	32	154	76	485	733	175	161	296	257	24	1952	149	33	59	373	131	48	235	110
SUPER-6005	86	74	317	113	106	892	104	101	135	34	37	363	146	2560	187	15	53	103	8427	48	39	79	29	28	305	636	107	131	102	210	57	3281	70	46	91	546	77	136	229	105
SUPER-6007	117	29	235	94	91	1066	81	679	476	22	8	249	224	6480	31	15	24	47	3594	33	12	6	72	42	243	590	312	106	87	149	75	1264	74	18	33	792	199	90	574	194
SUPER-6012	154	1029	1272	1200	483	976	37	346	178	88	47	426	361	7989	75	31	43	60	1657	36	127	74	57	43	291	282	539	192	209	158	209	1628	56	50	148	1719	250	215	1011	176
SUPER-7003	148	26	328	73	245	1269	21	476	443	25	12	482	148	11780	305	12	32	292	1045	14	6	12	32	381	331	469	109	161	111	159	237	693	25	21	16	484	110	66	372	157
SUPER-7004	101	49	1171	149	182	737	181	982	342	26	22	1913	252	9348	91	19	48	130	1118	70	6	15	122	44	395	916	166	288	174	526	98	657	213	17	237	804	209	79	684	262
SUPER-7005	318	39	557	108	372	249	57	769	199	24	10	730	339	6881	1485	20	39	1025	186317	16	13	28	180	448	115	563	331	180	248	228	357	1763	25	20	1791	809	257	56	501	140
SUPER-7009	304	120	541	185	159	12219	407	1174	140	89	54	243	466	11552	162	51	90	87	196	141	62	101	48	23	779	791	417	323	446	365	250	3548	420	49	107	893	255	198	545	338
SUPER-7010	259	52	137	203	124	3373	86	2662	131	49	13	121	500	19562	151	19	81	77	1432	17	17	11	73	40	1295	749	581	302	257	316	51	12277	55	30	157	820	239	97	682	267
SUPER-7015	358	83	5199	114	331	5284	23	548	1198	38	19	3430	648	5031	686	25	88	716	2211	8	19	28	255	335	413	2361	108	204	358	498	105	1407	18	21	12	708	210	167	814	204
SUPER-7017	41	8	75	15	20	68	4	92	18	2	1	145	34	424	12	3	6	21	109	4	0	2	11	9	73	104	20	16	18	23	20	45	0	3	1	44	16	5	38	18
SUPER-7018	49	9	396	40	20	426	42	206	82	12	5	194	107	1376	8	8	11	21	62	26	3	2	18	35	129	384	145	54	47	102	36	261	126	8	14	939	147	54	383	114
SUPER-7019	98	5	46	71	61	6404	39	992	2279	28	12	249	212	66135	105	18	18	150	5179	7	5	2	39	46	2536	1185	237	160	42	315	214	1276	18	13	583	971	275	111	671	307
SUPER-7020	50	30	128	13	9	1812	29	248	17	5	28	112	95	5735	35	17	16	60	2153	10	8	18	41	52	106	465	158	101	114	120	126	821	24	25	17	874	414	295	1350	434
SUPER-7021	916	184	7227	653	1067	816	350	1480	2118	104	23	2748	675	6851	106	44	171	203	3231	387	22	68	436	124	488	1096	678	420	384	518	29	479	1291	126	137	1069	454	316	893	190
SUPER-7023	86	22	254	106	43	2843	58	1432	63	15	6	259	248	33728	146	13	19	111	64	22	14	5	39	22	941	630	122	106	117	247	151	2243	60	19	20	1429	374	171	2177	458
SUPER-7025	479	143	3695	148	733	462	52	669	318	28	14	3199	801	7409	173	39	66	252	3420	12	16	29	355	204	153	2156	197	312	491	571	548	508	28	43	63	287	135	41	378	131
SUPER-7026	447	159	7677	178	929	5003	78	2336	1017	74	24	5088	1315	39210	1352	44	110	952	5964	28	39	40	270	580	2377	3509	425	278	592	1058	761	2737	64	71	44	882	372	171	1546	407
SUPER-7027	83	30	1302	48	75	4973	24	500	121	27	7	1067	245	11681	67	15	30	102	2877	5	11	15	51	51	619	905	312	155	84	231	178	2798	7	14	57	817	342	92	677	220
SUPER-7028	108	25	284	24	13	3003	10	1808	14	22	9	119	302	83528	15	15	19	83	51	7	8	6	28	16	403	1373	141	51	75	207	696	11836	18	17	25	540	161	149	615	282
SUPER-7029	633	96	3580	199	1200	182	180	697	712	44	11	1778	937	3455	2792	39	70	385	91200	94	8	36	320	732	266	1349	224	276	481	398	140	8730	343	42	165	509	184	85	673	215
SUPER-7030	465	80	2940	279	228	267	236	377	128	57	4	233	1049	5428	253	85	97	50	217	167	23	7	140	40	158	1148	304	136	549	244	10	2640	614	46	28	355	54	49	343	120
SUPER-7031	111	27	114	64	99	4912	9	1295	54	11	9	418	185	73457	259	15	10	206	4296	2	8	5	71	57	1264	1680	388	129	110	543	1538	5833	11	12	763	1261	292	70	866	226
SUPER-7032	3	7	8	4	3	146	4	18	6	0	2	8	4	16741	1	4	4	3	27	1	2	1	2	2	33	25	6	4	0	10	9	73	1	0	5	27	13	5	23	14
SUPER-7035	38	8	119	15	24	3606	18	620	14	10	3	244	85	18075	28	13	5	22	708	5	4	2	24	23	620	543	53	60	48	70	33	1628	25	6	20	342	73	80	214	66
SUPER-7036	15	17	6	77	10	1043	2	252	3	0	0	9	32	4737	3	4	1	6	36	2	2	1	11	1	142	393	43	6	9	36	67	1577	1	2	3	234	23	28	125	42
SUPER-7037	276	49	7771	249	835	870	54	863	605	12	3	4136	449	3587	345	6	71	526	1032	22	8	65	360	245	317	1018	281	63	350	299	9	2872	70	27	19	454	47	97	244	122
SUPER-8002	203	38	979	107	241	2682	31	392	402	35	6	1943	309	24404	23	23	36	126	3453	7	4	10	95	81	752	562	231	115	178	197	91	4033	19	27	126	433	141	34	207	81
SUPER-8004	43	15	151	4	25	438	59	165	6	7	5	115	57	2449	6	7	11	23	146	2	5	1	25	8	23	300	17	30	39	53	36	1033	1	3	4	219	52	28	200	68
SUPER-8005	75	45	343	73	23	2572	22	691	30	33	10	383	227	11496	13	23	30	100	7561	4	15	11	42	27	353	1307	93	144	165	418	188	2168	12	16	16	587	180	85	504	169
SUPER-8006	100	16	46	28	117	7933	8	621	23	10	16	282	55	127248	6176	4	15	70	13127	7	5	5	38	30	2457	963	110	119	38	375	52	5296	19	6	977	403	157	69	429	103
SUPER-8007	56	22	865	92	42	2462	77	1030	119	38	10	1622	82	40449	77	9	38	369	199	8	9	6	328	208	396	1574	145	289	69	381	33	2921	17	20	255	963	415	203	1318	356
SUPER-8008	1076	351	13669	336	1682	5447	111	3352	850	123	27	4542	2457	14636	57	49	101	305	565	11	40	165	755	594	859	2359	434	402	1388	877	368	3460	29	155	47	1487	605	208	1313	543
SUPER-8010	722	90	5724	260	1208	2090	159	2129	2292	54	12	2600	1244	26826	499	54	95	236	8160	85	13	42	307	372	634	1316	783	316	379	409	1026	1583	250	84	1172	2499	717	198	1843	414
SUPER-8012	728	146	13747	396	726	2470	167	1228	2489	116	11	6131	1376	25055	39	61	135	261	86	92	17	43	368	212	1138	1768	547	479	395	603	130	1635	182	91	14	967	416	84	832	199
SUPER-8013	41	8	27	19	6	2797	7	831	17	5	11	65	52	17484	16	10	2	42	6763	4	7	9	12	12	431	685	62	59	31	173	121	1979	11	5	54	817	263	106	712	209
SUPER-9001	22	260	34	22	23	4301	14	404	44	24	11	25	67	64223	37	13	23	76	250	14	7	13	32	11	97	157	202	85	63	78	171	8156	19	12	131	1122	295	119	766	302
SUPER-9002	151	56	331	139	235	2376	40	424	837	56	18	444	400	38239	116	18	28	84	2545	29	37	48	83	33	530	903	259	171	203	287	228	3374	47	46	384	947	218	95	555	276
SUPER-9003	35	74	37	41	38	1494	17	329	20	28	10	155	64	21732	120	7	13	42	332	18	19	27	50	16	55	267	141	79	56	155	22	9557	15	17	79	1139	181	104	479	191
SUPER-B002	143	33	402	129	127	1813	82	1482	135	43	19	416	177	5328	219	19	45	115	1914	35	18	32	25	52	501	1274	237	187	135	328	127	3043	125	23	936	870	278	94	742	314
SUPER-B009	95	23	78	12	93	1135	24	373	124	15	5	193	157	7032	31	11	10	28	8249	9	3	1	41	55	163	504	75	44	41	126	84	522	32	5	80	131	65	27	115	44
SUPER-B011	15	10	11	4	4	43	18	73	34	3	4	8	20	966	4	6	5	8	7	3	2	2	2	7	10	16	8	10	11	12	1	75	14	3	2	17	10	5	23	10
SUPER-B012	1405	215	9948	666	1588	1365	277	2017	4068	220	13	13777	1489	18870	120	73	300	479	379	44	12	113	1148	243	550	2160	965	388	1062	872	57	1702	223	170	45	1553	450	206	967	376
SUPER-B013	344	35	285	150	211	20589	30	2237	277	60	22	604	688	154116	406	33	21	210	3742	4	9	7	65	62	6629	1622	757	348	86	626	139	15258	13	12	462	1167	460	177	1138	419
SUPER-B015	999	127	6772	518	1024	800	68	985	1179	90	28	5126	2136	4911	182	72	141	883	8088	8	36	84	544	804	313	5898	430	896	988	937	242	1289	39	140	59	565	218	83	571	241
SUPER-B016	2	3	1	4	1	2	2	2	0	0	0	1	1	2	1	1	7	0	14	4	2	1	3	1	0	3	1	2	0	4	1	6	0	0	2	2	5	2	1	2
SUPER-B017	24	37	75	26	25	5219	22	367	14	19	8	114	44	19191	25	6	7	32	1058	6	8	0	15	17	509	513	59	62	24	208	42	1307	7	6	6	258	103	39	267	54
SUPER-B018	163	1763	1196	1951	416	3611	38	472	108	23	19	359	114	22586	103	30	85	63	651	19	6	6	82	26	624	374	1129	74	133	135	237	3467	70	9	74	2659	408	91	1555	508
SUPER-B019	117	17	196	43	268	4275	15	722	667	19	6	233	207	72588	48	12	16	80	10324	9	2	7	34	109	1937	628	492	69	49	186	326	1527	23	9	31	658	215	82	483	149
SUPER-B021	1	5	5	5	1	2	1	2	4	2	2	2	0	7	0	2	4	2	12	2	3	1	3	4	1	7	1	4	5	2	1	3	1	1	1	1	8	1	3	2
SUPER-B022	100	31	1240	44	73	10724	23	1044	66	43	7	400	213	111267	105	14	24	83	1322	5	6	4	27	43	2944	1638	331	171	47	482	179	2352	10	12	72	652	397	89	850	257
SUPER-B023	148	20	934	128	190	2114	56	940	223	41	7	2952	304	13995	130	10	43	82	487	27	7	9	121	43	679	492	140	100	117	239	140	1700	111	30	62	1549	324	174	788	345
SUPER-B024	10	7	81	3	6	495	13	220	11	9	8	50	15	4599	2	4	16	18	382	2	6	4	32	22	73	208	28	30	22	49	87	782	7	5	18	852	224	94	540	153
SUPER-B025	20	8	244	27	33	786	6	236	61	8	2	367	46	8236	8	4	12	16	56	2	2	2	18	4	350	165	47	17	13	36	14	535	7	8	9	171	33	25	167	80
SUPER-B026	22	11	18	56	109	609	4	492	17	29	0	7	21	4463	28	4	3	22	1522	2	2	2	18	7	250	151	123	64	24	31	13	678	0	3	19	250	86	30	251	85
SUPER-D001	118	39	219	38	136	30147	144	1902	64	28	23	255	220	312598	171	31	21	175	2072	46	10	5	39	24	6222	1110	247	124	80	416	369	9063	111	18	71	876	371	165	1019	264
SUPER-D002	48	14	78	38	72	2545	32	330	105	11	11	141	115	10757	312	19	17	128	9650	14	15	7	34	81	876	483	120	130	41	149	63	999	17	8	349	674	212	106	434	168
SUPER-D003	224	17	2469	202	340	2188	219	776	409	63	7	1109	306	7325	132	25	27	129	285	168	5	13	61	68	706	461	335	166	90	194	54	1007	625	24	334	692	226	69	528	147
SUPER-D004	85	140	391	1498	21	1611	10	442	19	12	2	95	62	29759	109	13	12	37	1109	5	4	5	34	8	400	333	276	52	37	96	469	4602	21	5	258	1047	275	174	1075	450
SUPER-D005	12	7	26	8	8	418	9	94	3	4	0	26	32	1977	5	2	5	5	818	3	4	1	3	5	47	94	8	12	14	26	26	138	3	0	4	166	44	10	74	31
SUPER-D006	103	20	1177	27	106	23	30	137	166	8	2	805	147	241	8	11	22	24	169	19	1	8	101	24	40	283	57	42	79	70	34	83	16	11	3	123	58	30	116	28
SUPER-D007	143	37	559	103	159	208	21	108	230	28	3	287	247	4056	52	20	21	39	607	8	4	5	64	22	67	372	98	51	179	116	27	1188	2	8	25	399	46	25	323	120
SUPER-D008	1417	276	9485	1231	1822	2162	593	1244	21868	302	19	13697	2573	12055	83	121	268	393	176	335	19	99	841	1222	671	1487	1034	659	1366	1119	61	3470	1769	104	82	1397	439	160	871	335
SUPER-D009	9	3	111	16	4	504	2	345	4	4	2	169	23	1829	8	6	4	31	881	2	3	4	8	21	40	449	15	20	17	43	29	356	6	4	4	108	34	51	111	50
SUPER-D010	31	9	80	45	49	262	7	510	26	7	1	340	33	1672	21	3	4	22	333	2	2	2	32	14	74	345	33	58	33	57	67	499	11	5	14	281	54	78	238	100
SUPER-D011	2	1	0	0	1	177	1	7	0	1	0	2	3	369	2	0	0	1	114	0	0	1	2	0	9	11	2	4	1	1	3	88	0	0	0	18	2	1	20	2
SUPER-H003	267	156	1879	617	567	711	1679	664	275	131	21	826	454	4484	257	50	174	113	390	899	121	116	133	102	425	546	565	519	301	240	93	511	4982	78	100	859	155	196	507	167
SUPER-W005	528	140	7267	401	1047	2323	308	1309	1277	85	27	3385	812	6630	215	22	114	289	966	122	23	73	501	244	497	1474	1309	460	468	575	149	2525	183	84	71	1118	320	147	881	279
SUPER-W006	142	35	915	110	173	3543	108	1142	139	71	7	701	350	38004	128	14	19	64	13890	39	7	4	53	34	1159	1044	452	109	111	248	188	1181	73	14	115	690	272	107	684	164
SUPER-W007	102	37	807	69	140	877	51	386	103	20	5	602	238	13999	39	16	15	29	190	7	5	15	58	31	212	350	191	47	138	120	120	244	19	7	15	510	165	43	696	120
SUPER-W009	186	44	1196	143	508	8868	646	1425	187	46	8	787	429	73068	188	24	90	200	5098	319	17	8	54	81	1479	1155	233	139	185	282	186	2524	1181	49	67	853	373	191	1126	424
SUPER-W010	225	41	622	40	46	210	14	572	34	14	4	586	252	2668	126	9	28	153	1145	2	2	6	77	96	204	1655	78	218	208	477	190	253	4	9	5	136	69	12	178	48
SUPER-W012	462	21	746	57	160	460	306	151	112	7	5	91	244	3154	20	17	39	60	40	73	16	5	61	22	48	200	87	91	283	91	45	208	405	9	24	133	57	48	95	86
W013	263	9	7	167	5	55	156	20	18	2	13	499	23	223	18	581	1	NA	16	NA	NA	NA	NA	NA	NA	NA	NA	NA	NA	NA	NA	NA	NA	NA	NA	NA	NA	NA	NA	NA
