# Supplementary material
Source: HighWire-hosted journal article supplement (https://jitc.bmj.com/content/11/1/e005809)
Supplement: inline-supplementary-material-5 [file inline-supplementary-material-5.xlsx]

## Sheet: Sup table 4
Sup table 4. Histopathology reviewed OncoTree classes and putative primary CUP classes with FDA approved ICI indications
T-CUP			105
		AD CK7+CK20-	28
		AD CK7+CK20- KRAS mut	5
		AD CK7+CK20+	12
		AD CK7+CK20+ KRAS Mut	4
		AD CK7-CK20-	1
		AD CK7-CK20- KRAS mut	1
		AD CK7-CK20+CDX2+	5
		ADNOS	2
		NETNOS	1
		PDC	25
		SCC p16+	4
		SCCNOS	9
		UDMN	7
		UDMN UV+	1
TOO assigned CUP classes			110
	FDA approved ICI responsive cancers		52
		Gastric	6
		Kidney	5
		Liver	1
		Lung	21
		Melanoma	5
		SCC cutaneous	5
		SCC esophogastric	1
		SCC HPV	5
		SCC Tonsil	1
		Urothelium	2
	Non ICI approved cancers		58
		Adrenal	1
		Ampulla	1
		Breast	11
		Cholangio	11
		Colorectal	8
		Mesothelioma	1
		Ovary/Fallopian tube	11
		Pancreas	1
		Pancreatic NET	1
		Prostate	2
		Sarcoma	3
		SCC Penile	1
		SCC Thymus	1
		Skin Adnexal	1
		Thyroid	1
		Uterus	3
		Grand Total	215
*Immunotherapy cases not included in the retrospective histopathology review
	FDA approved ICI responsive cancers		1
		Lymphoma	1
	FDA approved ICI responsive cancers		3
		AD CK7+CK20+	1
		AD CK7-CK20+	1
		AD CK7+CK20-	1
		Grand Total	4
